# Supplementary material for: The Influence Catalyst Layer Thickness on Resistance Contributions of PEMFC Determined by Electrochemical Impedance Spectroscopy
Source: MDPI journal article supplement (doi:10.3390/en14217299), 2021-11-04
Supplement: s1 [file s1]

Archive with 1 entries (1 files):
- energies-1386844-supplementary.pdf
